# Supplementary material for: Dose-dependent modulation effects of bioactive glass particles on macrophages and diabetic wound healing
Source: Royal Society of Chemistry journal article supplement (doi:10.1039/c8tb02938e), 2019-01-01
Supplement: c8tb02938e2.pdf [file c8tb02938e2.pdf]

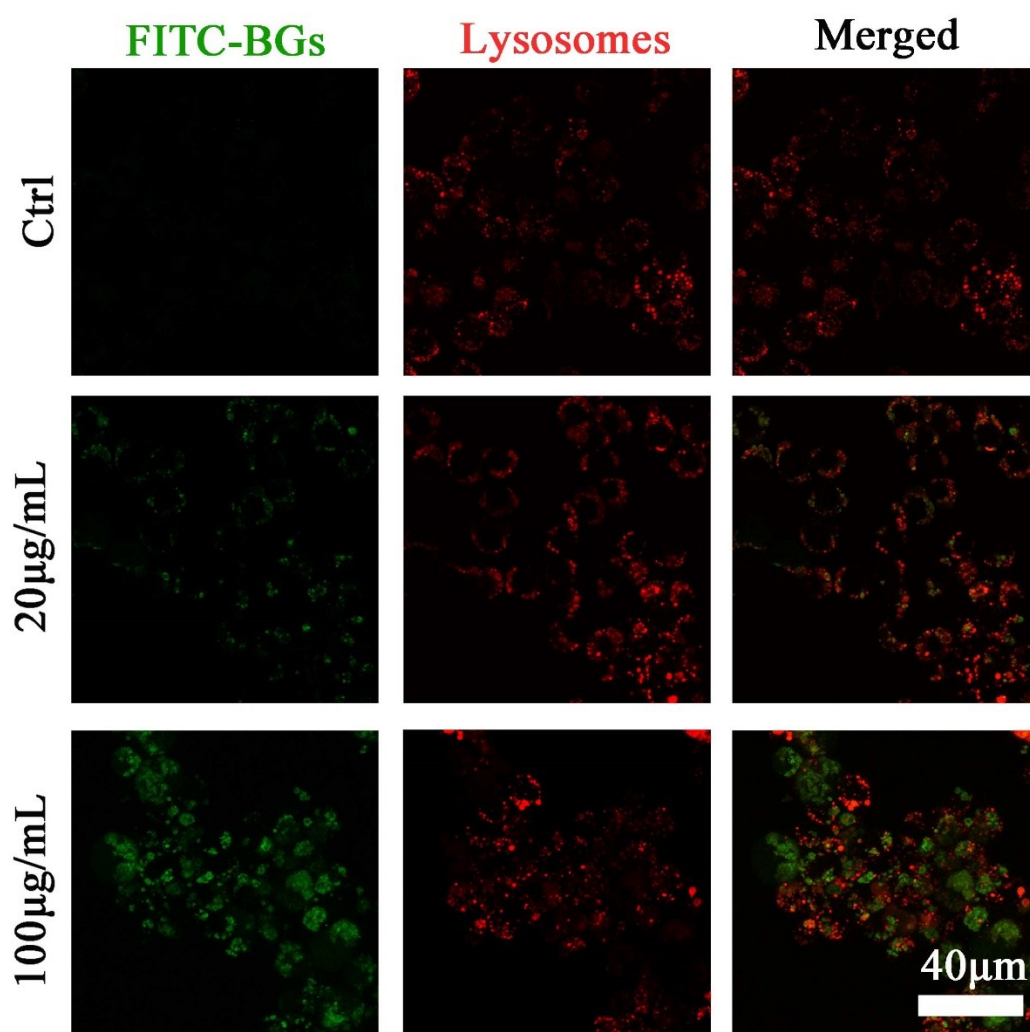

Supplementary Figure 1 Confocal microscopy images of the location of FITC-BGs in macrophages after 24h of culture.
